# Supplementary material for: Machine-learning-derived classifier predicts absence of persistent pain after breast cancer surgery with high accuracy
Source: Breast Cancer Res Treat. 2018 Jun 6;171(2):399–411. doi: 10.1007/s10549-018-4841-8 (PMC6096884; doi:10.1007/s10549-018-4841-8)
Supplement: Supplementary file 2 — Supplementary material 2 (XLSX 19 KB) [file 10549_2018_4841_MOESM2_ESM.xlsx]

## Sheet: Taul1
Supplementary table presenting all variables that were included into the Bayesian machine learning model. Abbreviations:BDI=Beck´s Depression Inventory; STAI=Spielbergers`s State and Trait Anxiety Inventory; STAXI=Spielberger´s State and Trait Anger Expression Inventory; NRS=Numeric Rating Scale; PACU=Post Anesthesia Care Unit ; PAD= Pathological Anatomical Diagnosis; PCA=Patient Controlled Analg…
Preoperative	Items	Perioperative period	First week	1st Month	4	6 Months	Items2	Oncological Data
		Premedication	questions were asked on days 1 to 7	Pain questions		Pain questions		Complications primary surgery(none, haematoma,infection,seroma,erysipelas, other,strangs,neurop pain,necrosis)
Age (years)		Cortisone medication during anesthesia (yes/no)	Pain in the operated breast in the morning (NRS 0-10)	Pain during the past week (NRS 0-10) in the operated side		Pain during the past week (NRS 0-10) in the operated side		Primary metastasis (yes/no)
Height (cm)		Dose of cortisone (mg)	operated side arm and axilla in the morning		breast		breast	Hormone therapy (yes/no)
Weight (kg)		Duration of operation (hours)	Pain in the operated breast in the evening (NRS 0-10)		axilla		axilla	Chemotherapy (yes/no)
BMI (body mass index)		Duration of 2nd operation (hours)	operated side arm and axilla in the evening		upper arm		upper arm	Taxanes
ASA class (I-IV)		Duration of anesthesia (hours)	Worst pain in the breast during day and night (NRS 0-10)		lower arm		lower arm	Antrasyclines
Other chronic pain (yes/no) (eg. migraine, fibromyalgia)		Total use of remifentanil during the 1st operation (mg)	in the arm and axilla during day and night		hand or fingers		hand or fingers	Metotrexat
Frequency of use of medication for pain (never, daily, weekly, monthly, a couple of times per year)		Total use of remifentanil during the 2nd operation (mg)	Average pain in the breast during day and night (NRS 0-10)		joints		joints	Herceptin
Other illnesses (yes/no) (e.g. diabetes)		Total use of remifentanil during anaesthesia (mg)	Average pain in the arm and axilla during day and night (NRS 0-10)	Maximum Pain in Breast, Axilla or UpperArm operated side (NRS 0-10)		Maximum Pain in Breast, Axilla or UpperArm to be operated (NRS 0-10)		Radiotherapy (yes/no)
Regular medication (no/yes)		Total use of propofol during the 1st operation (mg)	How many acetaminophen tablets à 1g during day and night (number)	Which joints are painful (e.g. elbow)		Which joints are painful (e.g. elbow)		Breast or ablations scar
P pills (no/yes)		Total use of propofol during the 2nd operation (mg)	How many ibuprofen 600mg tablets during day and night (number)	How often do you have pain in the joints (every day, almost every day during the week, some days during the week, once during the week)		How often do you have pain in the joints (every day, almost every day during the week, some days during the week, once during the week)		Boost
Age when P pills were started		Total use of propofol during anaesthesia (mg)	How many tablets of acetaminophen 500 mg + codeine 30 mg during day and night (number)	Pain during the past week somewhere else (e.g. abdomen, back)		Pain during the past week somewhere else (e.g. abdomen, back)		Axillar and/or supraclavic
For how many years were P pills used		Average state entrotopia during operation (index)	Has pain disturbed your sleep during the night (yse/no)	How often do you have pain somewhere else (every day, almost every day during the week, some days during the week, once during the week)		How often do you have pain somewhere else (every day, almost every day during the week, some days during the week, once during the week)
Hormone replacement therapy (yes/no)		Blood loss (ml)	Do you have nausea (yes/no)	How much has the pain in the following locations affected your life (NRS 0-10)		How much has the pain in the following locations affected your life (NRS 0-10)		Local recidive (yes/no)
Age when hormone replacement therapy was started		Operation	Have you vomited (yes/no)		in the breast		in the breast	Breast
Duration of hormon replacement therapy (years)		Operation side (right/left)	Other pain medication during the week		in the axilla		in the axilla	Axilla
Hysterectomy, performed (yes/no)		Location of the tumor (upper lateral, upper medial, lower lateral, lower medial, central, upper and lower lateral, upper multifocal, upper lateral and medial, upper lateral and central)	Drenage removed (days after operation)		in the upper arm		in the upper arm	Metastasis breast cancer (yes/no)
Ophorectomy, perfomermed (yes/no)		Parasternal lymfectomy (number)	Maximum pain (NRS 0-10)		in the lower arm		in the lower arm	Metastasis other cancer (yes/no)
Hormone therapy after hysterectomy or ophorectomy (yes/no)		SNB intercostobrachial nerves were (saved/partially saved/resected)			in the hand or fingers		in the hand or fingers
Use of alcohol (no, <6, 6-11, >11 or >40 doses per week)		Intercostobrachial nerves in axilla (saved/partially saved/resected)			in the joints		in the joints	Localisation of the first metastasis
Alcoholismus in the family (yes/no)		Intercostobrachial nerves axilla reoperation (saved/partially saved/resected)			somewhere else		somewhere else	Localisation of any other cancer
Smoking (never, stopped, periodically, daily)		PAD size all meassures (mm)		How much has the pain in the following locations disturbed your sleep (NRS 0-10)		How much has the pain in the following locations disturbed your sleep (NRS 0-10)		Recidives of any other cancer (yes/no)
Cigarettes per day (amount)		PAD first meassure (mm)			in the breast		in the breast	ER status positive (yes/no)
Duration of smoking in years		Multifocal tumor (yes/no)			in the axilla		in the axilla	PR status positive (yes/no)
Use of drugs of abuse (yes/no)		Histology of tumor (IDC, ILC, DCIS, other, no cancer)			in the upper arm		in the upper arm	Her2 status positive (yes/no)
Total number of any operations		Gradus of the Tumor (I-IV)			in the lower arm		in the lower arm	Gradus of the tumor (0-3)
Number of breast operations		Number of lymphonodes evacuated in the axilla			in the hand or fingers		in the hand or fingers	Ki 67 positive (yes/no)
Postoperative pain lasting >2 months (yes/no)		Number of metatastatic lymphonodes in the axilla			in the joints		in the joints	Ki 67 (0-100%)
Anesthesias in the past (no, general, local, generel and local anesthesias)		Size of metastatic lymphonodes (macro, micro, ITC)			somewhere else		somewhere else
Postoperative nausea and vomiting (yes/no)		Evacuated parasternal lymphonodes (number)		Did you have to give up something because of pain in the followin locations (yes/no)		Did you have to give up something because of pain in the followin locations (yes/no)		Vascular invasion (yes/no)
Travel sickness (yes/no)		Metastatic parastenal lymphonodes (number)			in the breast		in the breast	p53 positive (yes/no)
Number of pregnancies		Size of metastatic parasternal lymphonodes (macro, micro)			in the axilla		in the axilla	p53 (0-100%)
Number of labours					in the upper arm		in the upper arm	Histology of tumor (IDC,ILC,DCIS,Other,no cancer)
Age at first labour		PACU			in the lower arm		in the lower arm	Morphology groups (luminal A, luminal B, triple negative, Her2 positive)
Breast feeding (yes/no)		Pain intensity on arrival (NRS 0-10)			in the hand or fingers		in the hand or fingers	Multifocal tumor positive (yes/no)
Duration of breast feeding (months)		Rest pain intensity when 1st oxycodone (NRS 0-10)			in the joints		in the joints	Lymph nodes evacuated in the axilla (number)
Menarche age		Motion pain intenstity when 1st oxycodone (NRS 0-10)			somewhere else		somewhere else	Metastatic lymph nodes (number)
Age when mensturation ended		Rest pain intensity when satisfied with pain relief (NRS 0-10)		Does the pain in the following loacations get worse by any of the factors mentioned below? (yes/no)		Does the pain in the following loacations get worse by any of the factors mentioned below? (yes/no)		Parasternal lymfectomy (number)
Did your mother have breast cancer (yes/no)		Pain intensity in motion when satisfied with pain relief (NRS 0-10)			in the breast		in the breast	Metastatic parastenal lymph nodes (number)
At what age did your mother have breast cancer		Time from being satisfied to a new dose of oxycodone (minutes)			in the axilla		in the axilla	Biological Class of tumor (1-4)
Has any of your sisters had breast cancer (yes/no)	breast cancer?	Rest pain intensity when a new dose of oxycodone was needed (NRS0-10)			in the upper arm		in the upper arm	Class of risk, St.Gallen 2007 (0-3)
Number of sisters having breast ca at age < 50 yrs		Pain intensity on motion when a new dose of oxycodone was needed (NRS 0-10)			in the lower arm		in the lower arm
Number of sisters having breast ca at age > 50 yrs		Location of pain (nipple, breast, axilla,upper arm, lower arm)			in the hand and fingers		in the hand and fingers
Total number of sisters		Amount of IV oxycodone when satisfied (mg)			in the joints		in the joints
Hads any of your daughters had breast cancer (yes/no)		Total amount of IV oxycodone in PACU (mg)			somewhere else get worse		somewhere else get worse
Number of daughters with breast ca at < age of 50 yrs		Total amount of IV oxycodone in PACU (mg/kg)			carrying things		carrying things
Number of daughters with breast ca at > of 50 yrs		Oxycodone (normal release) 5mg tablets during 24 hours (number)			driving		driving
Ovarican cancer in the family (yes/no)		Ibuprofen 600mg during 24hours (number)			touch of clothes		touch of clothes
		Paracetamol 1g during 24 hours (number)			reaching at something		reaching at something
Pain questions		Oxycodone with PCA after PACU (mg)			handicraft		handicraft
Pain during the past week (NRS 0-10) in the area of		Total oxycodone (mg)			housework		housework
	breast to be operated	Total oxycodone (mg/kg)			walking		walking
	in the axilla of the side to be operated	Day surgery patient (yes/no)			weather		weather
	in the upper arm of the side to be operated	PCA dose (mg)			sleeping on that side		sleeping on that side
	in the lower arm of the side to be operated	Maximum pain intensity during 24h (NRS 0-10)			being still		being still
	in the hand or fingers of the side to be operated	Total time in PACU (hours)		Have you lost sensation of touch (yes/no)		Have you lost sensation of touch (yes/no)
	in the joints of the side to be operated	Nausea 2 h (yes/no)			in the breast		in the breast
Maximum Pain in Breast, Axilla or UpperArm to be operated (NRS 0-10)		Vomiting 2 h (yes/no)			in the axillary region		in the axillary region
Which joints are painful (e.g. elbow)		Metoclopramide 10mg during 2h			in the upper arm		in the upper arm
How often do you have pain in the joints (every day, almost every day during the week, some days during the week, once during the week)		DHBP 5 mg during 2h			in the lower arm		in the lower arm
Pain during the past week somewhere else (e.g. abdomen, back)		Ondansetron 4mg during 2h			in the hand or fingers		in the hand or fingers
How often do you have pain somewhere else (every day, almost every day during the week, some days during the week, once during the week)		Dexamethason during 2h		Do you experience clumsiness (yes/no)		Do you experience clumsiness (yes/no)
How much has the pain in the following locations affected your life (NRS 0-10)		Nausea between 2 to 24 h (yes/no/yes with medication)			in the upper arm on the operated side		in the upper arm on the side to be operated
	in the breast	Vomiting between 2 to 24 h (yes/no/yes with medication)			in the contralateral upper arm		in the contralateral upper arm
	in the axilla	Metoclopramide 10mg 2 to 24h			in the lower extremities		in the lower extremities
				Do you have phantom sensations (yes/no)		Do you have phantom sensations (yes/no)
	in the upper arm	DHBP 5mg 2 to 24h		Do you have weakness in the upper arm of the operated side (yes/no)		Do you have weakness in the upper arm of the operated side (yes/no)
	in the lower arm	Ondansetron between 2 to 24 h		Have you used any medication for pain during the past week (yes/no)		Have you used any medication for pain during the past week (yes/no)
	in the hand or fingers	Dexamethason 4mg between 2 to 24 h		How often did you take pain medication during the past week (every day, almost every day during the week, some days during the week, once during the week)		How often did you take pain medication during the past week (every day, almost every day during the week, some days during the week, once during the week)
	in the joints	Other pain medication during 24 hours		Other treatments for pain during the past month (e.g. physiotherapy)		Other treatments for pain during the past month (e.g. physiotherapy)
	somewhere else	Complications during 24 h (reoperation beacuse of bleeding/PCA taken off)		The effect of the other treatment (NRS 0-10)		The effect of the other treatment (NRS 0-10)
How much has the pain in the following locations disturbed your sleep (NRS 0-10)				Own treatments (yes/no)		Own treatments (yes/no)
	in the breast			Can you place your hand on your head (yes/no)		Can you place your hand on your head (yes/no)
	in the axilla				with the hand of the operated side		with the hand of the side to be operated
	in the upper arm				with the hand of the other side		with the hand of the other side
	in the lower arm			Can you place your hand on your shoulder		Can you place your hand on your shoulder
	in the hand or fingers				with the hand of the operated side		with the hand of the side to be operated
	in the joints				with the hand of the other side		with the hand of the other side
	somewhere else			Can you place your hand behind your waist		Can you place your hand behind your waist
Did you have to give up something because of pain in the followin locations (yes/no)					with the hand of the operated side		with the hand of the side to be operated
	in the breast				with the hand of the other side		with the hand of the other side
	in the axilla			Can you place your hand on your shoulder blade		Can you place your hand on your shoulder blade
	in the upper arm				with the hand of the operated side		with the hand of the side to be operated
	in the lower arm				with the hand of the other side		with the hand of the other side
	in the hand or fingers			Can you raise your arm straight forward		Can you raise your arm straight forward
	in the joints				arm of the operated side		arm of the side to be operated
	somewhere else				arm of the other side		arm of the other side
Does the pain in the following loacations get worse by any of the factors mentioned below? (yes/no)				Regular medication(no/yes)		Regular medication(no/yes)
	in the breast			Do you still have menstruation?(no/yes)		Do you still have menstruation?(no/yes)
	in the axilla			Menstruation stopped year?		Menstruation stopped year?
	in the upper arm			Smoking(never, stopped, periodically, daily)		Smoking(never, stopped, periodically, daily)
	in the lower arm
	in the hand and fingers			Menopause symptoms		Reoperation during 2 months
	in the joints			Hot flashes (never, at least once per week, once per day, many times per day)		Final Breast Surgery upto6mo(type of surgery)
	somewhere else get worse			How many times during a day (number)		Final Axillary Surgery upto6mo(type of surgery)
	carrying things			Night sweating (never, at least once per week, every night)
	driving			Insomnia (never, at least once per week, every night)		Menopause symptoms
	touch of clothes			Joint pain in the morning (no, mild, moderate, severe)		Hot flashes (never, at least once per week, once per day, many times per day)
	reaching at something			Joint pain during the day (no, mild, moderate, severe)		How many times during a day (number)
	handicraft			Muscle pain in the morning (no, mild, moderate, severe)		Night sweating (never, at least once per week, every night)
	housework			Muscle pain during the day (no, mild, moderate, severe)		Insomnia (never, at least once per week, every night)
	walking			Vaginal dryness (no, mild, moderate, severe)		Joint pain in the morning (no, mild, moderate, severe)
	weather			Difficulties with urinating (no, mild, moderate, severe)		Joint pain during the day (no, mild, moderate, severe)
	sleeping on that side			Psychological variables		Muscle pain in the morning (no, mild, moderate, severe)
	being still			Depressive symptoms (BDI)		Muscle pain during the day (no, mild, moderate, severe)
Have you lost sensation of touch (yes/no)				State Anxiety (STAI)		Vaginal dryness (no, mild, moderate, severe)
	in the breast			Trait Anxiety (STAI)		Difficulties with urinating (no, mild, moderate, severe)
	in the axillary region			Anger inhibition (STAXI)		Psychological variables
	in the upper arm			Anger expression (STAXI)		Depressive symptoms (BDI)
	in the lower arm					State Anxiety (STAI)
	in the hand or fingers					Trait Anxiety (STAI)
Do you experience clumsiness (yes/no)						Anger inhibition (STAXI)
	in the upper arm on the side to be operated					Anger expression (STAXI)
	in the contralateral upper arm
	in the lower extremities
Do you have weakness in the upper arm of the side to be operated (yes/no)
Have you used any medication for pain during the past week (yes/no)
How often did you take pain medication during the past week (every day, almost every day during the week, some days during the week, once during the week)
Did youuse other treatments for pain during the past month (e.g. physiotherapy)
The effect of the other treatment (NRS 0-10)
Own treatments (yes/no)
Can you place your hand on your head (yes/no)
	with the hand of the side to be operated
	with the hand of the other side
Can you place your hand on your shoulder
	with the hand of the side to be operated
	with the hand of the other side
Can you place your hand behind your waist
	with the hand of the side to be operated
	with the hand of the other side
Can you place your hand on your shoulder blade
	with the hand of the side to be operated
	with the hand of the other side
Can you raise your arm straight forward
	arm of the side to be operated
	arm of the other side
Do you exercise ice swiming (yes/no)
How often do you exercise ice swiming (daily, weekly, monthly)
Menopause symptoms
Hot flashes (never, at least once per week, once per day, many times per day)
How many times during a day (number)
Night sweating (never, at least once per week, every night)
Insomnia (never, at least once per week, every night)
Joint pain in the morning (no, mild, moderate, severe)
Joint pain during the day (no, mild, moderate, severe)
Muscle pain in the morning (no, mild, moderate, severe)
Muscle pain during the day (no, mild, moderate, severe)
Vaginal dryness (no, mild, moderate, severe)
Difficulties with urinating (no, mild, moderate, severe)
Psychological variables
Depressive symptoms (BDI)
State Anxiety (STAI)
Trait Anxiety (STAI)
Anger inhibition (STAXI)
Anger expression (STAXI)
Expectation of postoperative pain intensity (NRS 0-10)
